# Supplementary material for: Comparative Validation of Five Quantitative Rapid Test Kits for the Analysis of Salt Iodine Content: Laboratory Performance, User- and Field-Friendliness
Source: PubMed Central journal article supplement (PMC4581857; doi:10.1371/journal.pone.0138530), 2015-09-24
Supplement: pone.0138530.s001.pdf [file pone.0138530.s001.pdf]

**This supplementary file contains the user-modified instructions in French that were used for the following study:**

**Comparative validation of five quantitative rapid test kits for the analysis of salt iodine content: laboratory performance, user- and field-friendliness**

Fabian Rohner<sup>1</sup>, Marcelline O. Kangambèga<sup>2</sup>, Noor Khan<sup>3</sup>, Robert Kargougou<sup>4</sup>, Denis Garnier<sup>4</sup>, Ibrahima Sanou<sup>2</sup>, Bertine D. Ouaro<sup>5</sup>, Nicolai Petry<sup>1</sup>, James P. Wirth<sup>1</sup>, and Pieter Jooste<sup>6</sup>

<sup>1</sup> GroundWork LLC, Crans-près-Céligny, Switzerland

<sup>2</sup> Laboratoire National de Santé Publique, Ouagadougou, Burkina Faso

<sup>3</sup> The Micronutrient Initiative, Ottawa, Canada

<sup>4</sup> UNICEF, Ouagadougou, Burkina Faso

<sup>5</sup> Direction de la Nutrition, Ministère de Santé, Ouagadougou, Burkina Faso

<sup>6</sup> Iodine Global Network South Africa, Cape Town, South Africa, Centre of Excellence for Nutrition, North-West University, Potchefstroom, South Africa

**Please note that these instructions are not those endorsed by the suppliers of the different devices, nor are they comprehensive in terms of describing all steps involved but only those relevant for our study.**

## 1. Préparer l'échantillon

- Peser environ 10 g\* de sel et enregistrer le poids exact dans votre documentation.
- Ensuite, mesurer ou peser dans environ 50 ml d'eau. Notez le poids exact.
- Mélanger votre échantillon de sel avec de l'eau jusqu'à ce sel est complètement solubilisé.

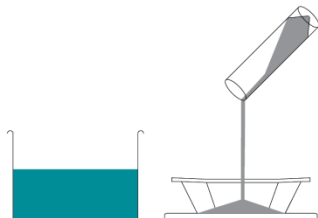

## 3. Injecter l'échantillon

- Injecter EXACTEMENT 1 ml d'échantillon.
- Pour réduire la pression de l'air dans le flacon, faire sortir 1,0 ml d'air avant de retirer la seringue.
- Mélanger la solution en renversant lentement le flacon 3 à 5 fois et attendre 5 minutes.

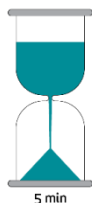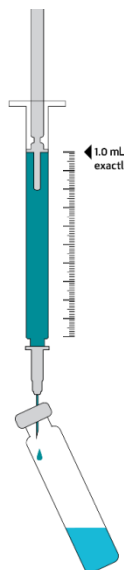

## 2. Activer les flacons de réactif Iodine

- Activer les flacons Iodine en injectant EXACTEMENT 0,2 ml (200 µl) de solution d'additif (flacons à capuchon bleu) dans chaque flacon de réactif.
- Mélanger lentement les solutions

→ Vous pouvez activer autant de flacon de réactif que vous utilisez dans 1 jour

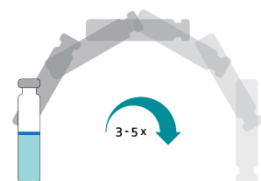

## 4. Insérer le flacon

- Ne pas toucher la partie transparente du flacon!
- Remettre le capuchon iCheck sur l'unité de mesure
- Allumer iCheck
- Appuyer sur flèche verte

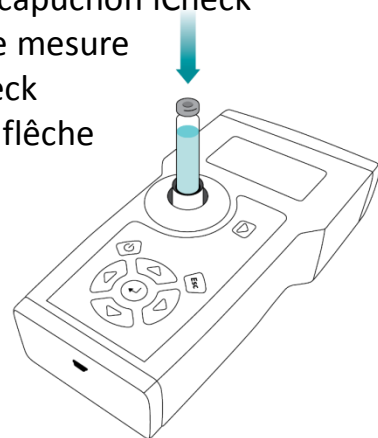

## 5. Mesurer

- Appuyez encore une fois sur la flèche verte pour commencer l'analyse
- Ré-positionner le flacon 4 fois (« next position »)
- Mettre capuchon, et appuyer sur flèche verte
- Noter le résultat en mg/L

## 6. Documenter

- Noter les pesées sur la fiche
- Noter le résultat sur la fiche\*
- Vérifiez que toutes les fiches sont au complet!!

\* Si vous savez d'avance que la teneur en iode est supérieur à 50 ou 60 ppm, vous diluez les 10 g dans 100 ml d'eau au lieu de 50 ml. Egalement, si le résultat d'un sel inconnu indique une forte teneur en iode, répéter l'analyse avec la dilution 10 g dans 100 ml.

# ID-ERTK (Inde)

## 1. Préparer l'échantillon

- Peser EXACTEMENT 10 g de sel et noter le poids dans votre documentation.
- Ensuite, ajouter EXACTEMENT 50 ml d'eau. Notez le poids exact, et dissolvez le sel.
- En cas d'impuretés, filtrer la solution
- S'il s'agit du gros sel, cassez-le avec un mortier/coupelle

## 3. Préparer la solution test

- Pipetter 1 mL d'échantillon dans la cuvette
- Ajouter 1,5 mL de solution acide (ACIDE)
- Ajouter 0,5 mL de solution KI (Sol KI)
- Ajouter 1,0 mL de solution amidon (AMID)
- Mélanger la solution en renversant lentement la cuvette
- Mesurer dans <1 minute après mélange!

## 5. Lire le résultat

- Si le résultat est entre 15 -50 ppm, la teneur s'affiche directement en PPM
- '[ [' signifie <15 ppm
- ']' ]' signifie > 50 ppm
- En cas où le résultat indique > 50 ppm, répéter l'échantillon en prenant la même quantité de sel, mais double quantité eau  
→ après lecture du résultat, multiplier par 2 afin d'indiquer la bonne concentration

## 2. Pré-chauffer l'appareil ID-ERTK

- Insérer la cuvette rempli d'eau
- Allumer l'appareil, il marque 'ST'
- Une fois prêt, il marque '00'
- L'appareil a été calibré et est prêt à usage

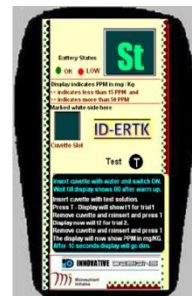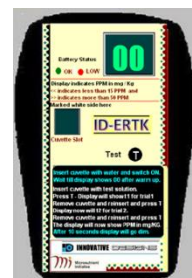

## 4. Insérer la cuvette

- Ne pas toucher la partie transparente de la cuvette!
- Insérer la cuvette avec le couvercle
- Vérifier direction: côtés transparents verticalement
- Appuyer sur 'test'
- L'écran montre 't1' pour la 1<sup>ère</sup> mesure
- Enlever et ré-insérer, appuyer 'test'
- L'écran montre 't2'
- Enlever, ré-insérer, appuyer 'test'
- Après 't3', le résultat s'affiche

## 6. Documenter

- Noter les pesées sur la fiche
- Noter le résultat sur la fiche
- Vérifiez que toutes les fiches sont au complet!!

## iReader

Peser EXACTEMENT 1 g de sel + 5 mL d'eau

Agiter pour dissoudre le sel

Ajouter 0,55 mL de la solution + 3 mL du I-réactif (I-reagent), soit 2x remplir la pipette dans un tube pyrex

Bien agiter, laisser reposer 5 minutes

En présence d'iode, la solution devient bleue; mesurer la concentration d'iode en PPM de l'écran de l'appareil

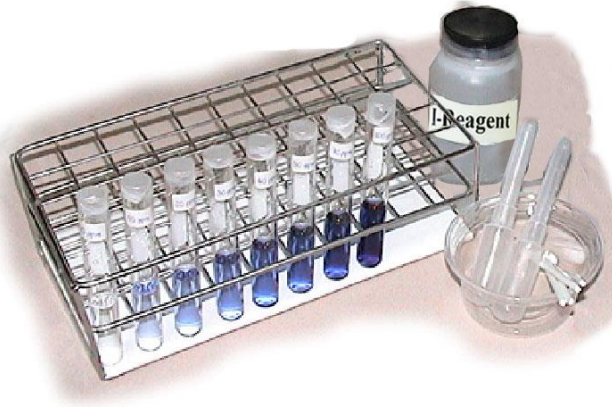

### Procédure pour manipuler le I-Reader:

1. Appuyer sur le bouton 'ON/OFF' pour allumer l'appareil
2. Insérer un 'blanc' (tube pyrex contenant de l'eau distillée), appuyer '2'
3. Appuyer '1', insérer tube d'échantillon dans la machine, appuyer encore une fois sur '1'
4. Noter la concentration sur l'écran en PPM
5. Répéter les pas 3 et 4 pour d'autres échantillons d'une même série

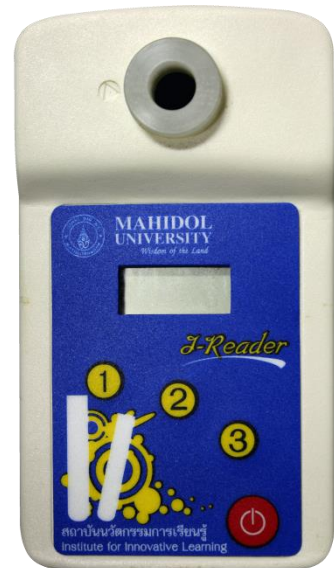

## saltPAD

Comment utiliser le saltPAD pour mesurer la teneur en iode dans du sel

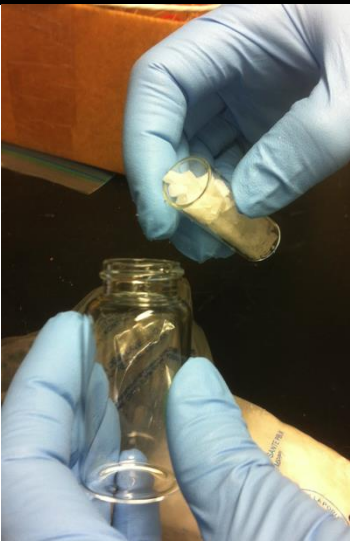

1. Peser 3.25 g sel.\*

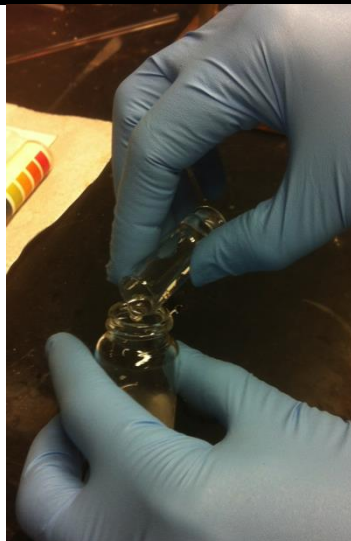

2. Ajouter 15 g eau

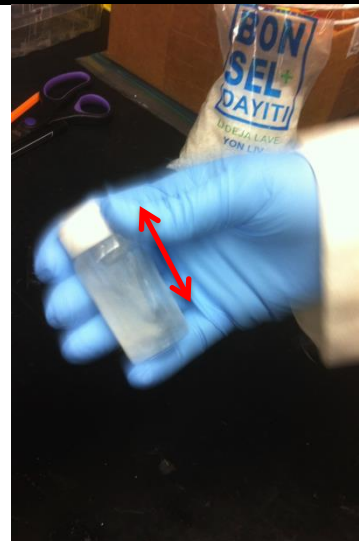

3. Agitez pour dissoudre complètement

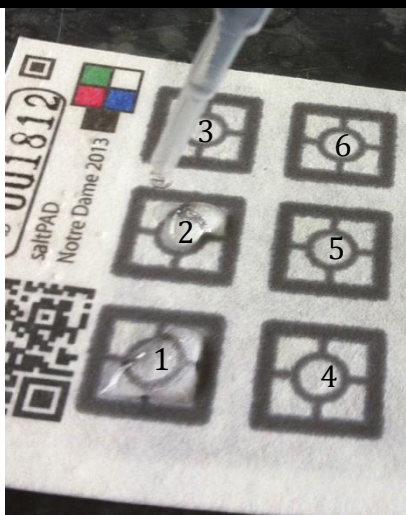

4. Appliquer 3 gouttes (125  $\mu$ L) de solution à chaque carré dans l'ordre montré. S'assurer que toutes les 5 parties dans chaque carré sont mouillées.

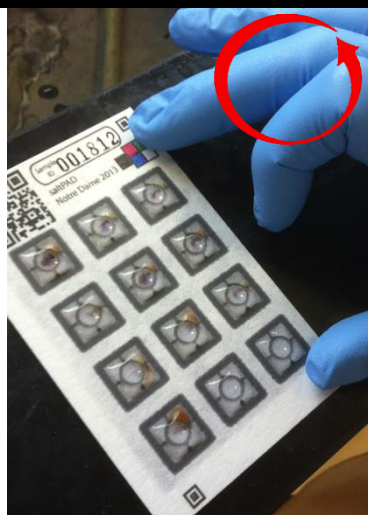

5. Agiter gentiment la carte en cercles pendant 3 minutes.

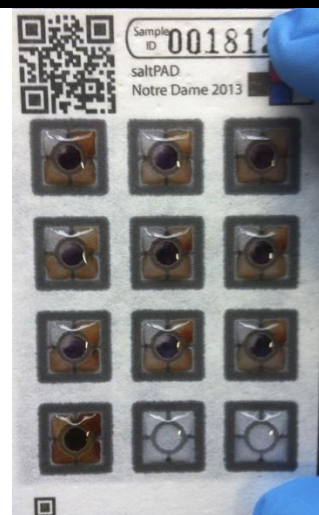

6. Comparer résultats aux images standard, et prendre une photo selon les instructions sur la page suivante.

## 1. Matériel supplémentaire requis

- Solution A
- Solution B
- Vérificateur d'iode WYD
- Batteries ou source électrique
- Cuvettes
- Verre de Gray
- Balance de précision (0,01g)
- Tubes de 50ml,
- Chronomètre
- Pipette de 5ml et 10ml

## 3. Calibrage du WYD

- Réglage du point Zéro:
- Prendre cuvette et remplir avec eau pure
- Insérer la cuvette dans le bon sens
- Appuyer sur le bouton d'auto calibration (O), la valeur (0,0) apparaît
- Verre de Gray:
- Insérer le verre de Gray
- Ajuster la mesure à 50 avec boutons  $\wedge$  ou  $\vee$

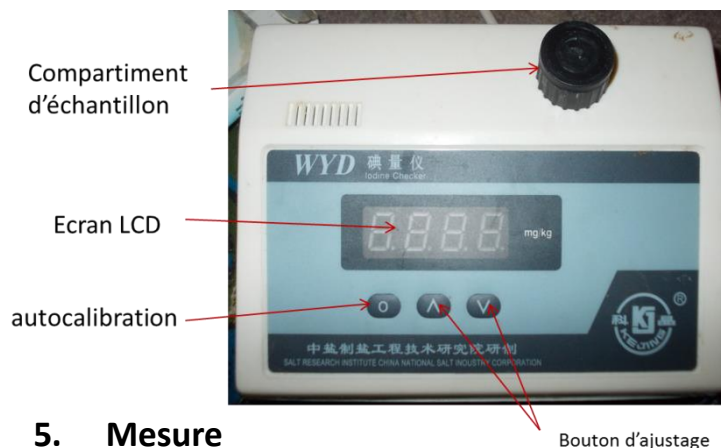

## 5. Mesure

- Ne pas toucher la partie transparente de la cuvette!
- Insérer la cuvette
- Vérifier direction: côtés transparents horizontalement
- La teneur s'affiche directement en PPM

## 2. Pré-chauffer l'appareil WYD

- Brancher l'appareil ou mettre des batteries
- Appuyer sur ON
- Laisser l'appareil se chauffer pendant 10 minutes
- Si l'appareil est resté longtemps (plus d'une semaine) sans fonctionner, prolonger le temps de chauffage

## 4. Préparer la solution test

- Peser  $1 \pm 0,05$ g d'échantillon bien mélangé
- Transférer cette masse de sel dans un tube de 50 ml
- Ajouter 10ml d'eau distillée dans le tube
- Ajouter 2ml de la solution A
- Ajouter 2ml de la solution B
- Ajouter de l'eau distillée dans le tube jusqu'à 50ml
- Bien secouer la solution

## 6. Documenter

- Noter les pesées sur la fiche
- Noter le résultat sur la fiche
- Vérifiez que toutes les fiches sont au complet!!
